# Supplementary material for: Future trends of life expectancy by education in the Netherlands
Source: Springer Nature journal article supplement (doi:10.1186/s12889-022-13275-w), 2022-09-02
Supplement: MOESM1 [file 23447478]

Supplementary material to “Future trends of life expectancy by education in the Netherlands”

by WJ Nusselder & AMB De Waegenaere et al, BMC Public Health 2022,

Appendix 1 European data by education and gender

Table A1-1 European mortality data by sex, age, education

| Country     | Type         | Years                       | Census date | Length of follow-up (year) | Geographic coverage |
|-------------|--------------|-----------------------------|-------------|----------------------------|---------------------|
| Belgium     | Longitudinal | March 1 1990 – Dec 31, 1997 | 1.3.1997    | 6 Y, 10 M                  | National            |
|             |              | Oct, 1 2001 – Dec 31, 2011  | 1.19.2001   | 10, 3 M                    | National            |
| Denmark     | Longitudinal | Jan 1, 1995- Dec 31 1999    | 1995        | 5                          | National            |
|             |              | Jan 1, 2000- Dec 31 2004    | 2000        | 5                          | National            |
|             |              | Jan 1, 2005- Dec 31 2009    | 2005        | 5                          | National            |
|             |              | Jan 1 2010- 3Dec 31 2014    | 2010        | 5                          | National            |
|             |              | March 2011-December 2013    | March 2011  | 2 Y, 10 M                  | National            |
| Finland     | Longitudinal | Dec 31, 1990 – Dec 31, 2000 | 31.12.1990  | 10                         | National            |
|             |              | Dec 31, 2000 – Dec 31, 2010 | 31.12.2000  | 10                         | National            |
|             |              | Dec 31, 2010 – Dec 31, 2014 | 31.12.2010  | 4                          | National            |
| Norway      | Longitudinal | Nov, 1990 – Dec, 2001       | Nov, 1990   | 11                         | National            |
|             |              | Nov, 2001 – Dec, 2009       | Nov, 2001   | 8                          | National            |
|             |              | Jan 2000 – Dec 2008         | 1.2001      | 9                          | National            |
| Switzerland | Longitudinal | Dec 4, 1990 – Dec 5, 2000   | 4.12.1990   | 10                         | National            |
|             |              | Dec 31, 2000 – Dec 31, 2010 | 5.12.2000   | 10                         | National            |
|             |              | Dec 31 2010 – Dec 31, 2014  | 31.12.2010  | 4                          | National            |

**Table A1-2 Summary of total number of deaths and person years, based on European**

| <b>Country</b> | <b>Education</b> | <b>Deaths</b> | <b>Person<br/>Years</b> |
|----------------|------------------|---------------|-------------------------|
| Belgium        | Low              | 1165334       | 51038290                |
| Belgium        | Mid              | 177225        | 21504660                |
| Belgium        | High             | 118836        | 18624384                |
| Denmark        | Low              | 393680        | 20345764                |
| Denmark        | Mid              | 228399        | 25201252                |
| Denmark        | High             | 85028         | 15028869                |
| Finland        | Low              | 1587379       | 62060261                |
| Finland        | Mid              | 255404        | 30618591                |
| Finland        | High             | 168860        | 24107525                |
| Netherlands    | Low              | 115021        | 14912715                |
| Netherlands    | Mid              | 72196         | 21782186                |
| Netherlands    | High             | 37231         | 20698799                |
| Norway         | Low              | 992196        | 29689344                |
| Norway         | Mid              | 477520        | 25580187                |
| Norway         | High             | 96907         | 8631005                 |
| Switzerland    | Low              | 587125        | 20831871                |
| Switzerland    | Mid              | 478580        | 41367716                |
| Switzerland    | High             | 119882        | 14022826                |
