# Supplementary material for: Future trends of life expectancy by education in the Netherlands
Source: Springer Nature journal article supplement (doi:10.1186/s12889-022-13275-w), 2022-09-02
Supplement: MOESM3 [file 23447478]

**Supplementary material to “Future trends of life expectancy by education in the Netherlands”**

**by WJ Nusselder & AMB De Waegenaere et al, BMC Public Health 2022,**

Appendix 3 Life expectancy (LE) between age 35 and 80

|              | Low  | Change since 2018 |          | Mid  | Change since 2018 |          | High | Change since 2018 |          |  |
|--------------|------|-------------------|----------|------|-------------------|----------|------|-------------------|----------|--|
|              |      | Total             | Per year |      | Total             | Per year |      | Total             | Per year |  |
| <b>Men</b>   |      |                   |          |      |                   |          |      |                   |          |  |
| LE35-80      |      |                   |          |      |                   |          |      |                   |          |  |
| 2018         | 41.7 |                   |          | 43.7 |                   |          | 45.3 |                   |          |  |
| 2033         | 42.6 | 0.9               | 0.06     | 45.2 | 1.5               | 0.10     | 46.4 | 1.1               | 0.07     |  |
| 2048         | 43.4 | 1.7               | 0.06     | 46.3 | 2.6               | 0.09     | 47.2 | 1.9               | 0.06     |  |
| <b>Women</b> |      |                   |          |      |                   |          |      |                   |          |  |
| LE35-80      |      |                   |          |      |                   |          |      |                   |          |  |
| 2018         | 44.1 |                   |          | 45.8 |                   |          | 46.6 |                   |          |  |
| 2033         | 44.3 | 0.4               | 0.02     | 46.7 | 0.9               | 0.06     | 47.3 | 0.7               | 0.04     |  |
| 2048         | 44.5 | 0.4               | 0.01     | 47.4 | 1.6               | 0.05     | 47.9 | 1.3               | 0.04     |  |
