# Supplementary material for: Future trends of life expectancy by education in the Netherlands
Source: Springer Nature journal article supplement (doi:10.1186/s12889-022-13275-w), 2022-09-02
Supplement: MOESM4 [file 23447478]

**Supplementary material to “Future trends of life expectancy by education in the Netherlands” by WJ Nusselder & AMB De Waegenaere et al, BMC Public Health 2022,**

**Appendix 4: Life expectancies by calendar year**

Table A3-1 Life expectancy between age 35 and 85 and remaining life expectancy at age 35 and 65 by education and gender based on modelled mortality rates for period 2006 to 2048 for the Netherlands

|      | LE35-85 |      |      |       |      |      | LE35 |      |      |       |      |      | LE65 |      |      |       |      |      |
|------|---------|------|------|-------|------|------|------|------|------|-------|------|------|------|------|------|-------|------|------|
|      | Men     |      |      | Women |      |      | Men  |      |      | Women |      |      | Men  |      |      | Women |      |      |
|      | Low     | Mid  | High | Low   | Mid  | High | Low  | Mid  | High | Low   | Mid  | High | Low  | Mid  | High | Low   | Mid  | High |
| 2006 | 40.4    | 42.1 | 44.3 | 43.8  | 45.1 | 46.0 | 41.8 | 43.9 | 47.2 | 46.8  | 48.9 | 50.1 | 16.0 | 17.1 | 19.3 | 19.8  | 21.2 | 21.8 |
| 2007 | 40.6    | 42.6 | 44.3 | 44.0  | 45.3 | 46.1 | 42.0 | 44.7 | 47.1 | 47.1  | 49.2 | 50.5 | 16.1 | 17.6 | 19.3 | 20.0  | 21.4 | 22.2 |
| 2008 | 41.1    | 42.3 | 44.3 | 43.8  | 45.5 | 46.0 | 42.7 | 44.1 | 47.1 | 46.8  | 49.4 | 50.4 | 16.5 | 17.2 | 19.3 | 19.9  | 21.7 | 22.2 |
| 2009 | 40.9    | 42.7 | 44.4 | 44.1  | 45.3 | 46.1 | 42.5 | 44.8 | 47.3 | 47.5  | 49.3 | 50.6 | 16.5 | 17.7 | 19.5 | 20.3  | 21.6 | 22.3 |
| 2010 | 41.0    | 42.9 | 44.5 | 44.1  | 45.6 | 45.5 | 42.6 | 45.0 | 47.5 | 47.5  | 49.7 | 48.5 | 16.5 | 17.8 | 19.6 | 20.3  | 21.9 | 20.4 |
| 2011 | 41.1    | 43.2 | 44.8 | 43.9  | 45.3 | 46.2 | 42.8 | 45.5 | 48.0 | 47.2  | 49.5 | 50.6 | 16.7 | 18.2 | 20.0 | 20.3  | 21.7 | 22.3 |
| 2012 | 41.3    | 43.1 | 44.8 | 43.9  | 45.4 | 46.3 | 43.1 | 45.4 | 47.8 | 47.1  | 49.6 | 51.0 | 16.9 | 18.1 | 19.9 | 20.2  | 21.8 | 22.7 |
| 2013 | 41.4    | 43.1 | 45.0 | 44.2  | 45.5 | 46.1 | 43.2 | 45.2 | 48.2 | 47.7  | 49.7 | 50.1 | 17.0 | 18.0 | 20.1 | 20.6  | 21.9 | 21.8 |
| 2014 | 41.6    | 43.5 | 45.1 | 44.2  | 45.4 | 46.4 | 43.5 | 45.9 | 48.3 | 47.8  | 49.8 | 51.1 | 17.2 | 18.5 | 20.3 | 20.8  | 21.9 | 22.7 |
| 2015 | 41.7    | 43.6 | 45.0 | 44.1  | 45.6 | 46.4 | 43.6 | 46.1 | 48.1 | 47.6  | 50.0 | 51.0 | 17.3 | 18.6 | 20.2 | 20.6  | 22.1 | 22.7 |
| 2016 | 41.4    | 43.8 | 45.1 | 44.0  | 45.5 | 46.4 | 43.1 | 46.4 | 48.4 | 47.3  | 49.8 | 50.6 | 17.1 | 18.8 | 20.3 | 20.5  | 21.9 | 22.3 |
| 2017 | 41.5    | 43.6 | 45.3 | 44.1  | 45.9 | 46.6 | 43.3 | 45.9 | 48.6 | 47.5  | 50.3 | 51.4 | 17.2 | 18.5 | 20.5 | 20.6  | 22.4 | 23.0 |
| 2018 | 41.7    | 43.7 | 45.3 | 44.1  | 45.8 | 46.6 | 43.6 | 46.0 | 48.7 | 47.5  | 50.3 | 51.5 | 17.3 | 18.5 | 20.5 | 20.7  | 22.3 | 23.0 |
| 2019 | 41.8    | 43.8 | 45.4 | 44.1  | 45.9 | 46.7 | 43.7 | 46.2 | 48.8 | 47.6  | 50.4 | 51.6 | 17.4 | 18.7 | 20.6 | 20.7  | 22.4 | 23.1 |
| 2020 | 41.8    | 44.1 | 45.5 | 44.2  | 46.0 | 46.7 | 43.7 | 46.6 | 48.9 | 47.7  | 50.6 | 51.4 | 17.5 | 19.0 | 20.7 | 20.9  | 22.6 | 22.9 |

|      |      |      |      |      |      |      |      |      |      |      |      |      |      |      |      |      |      |      |
|------|------|------|------|------|------|------|------|------|------|------|------|------|------|------|------|------|------|------|
| 2021 | 41.9 | 44.1 | 45.6 | 44.2 | 46.1 | 46.7 | 43.8 | 46.7 | 49.1 | 47.8 | 50.7 | 51.6 | 17.5 | 19.0 | 20.8 | 21.0 | 22.7 | 23.1 |
| 2022 | 41.9 | 44.2 | 45.7 | 44.2 | 46.1 | 46.8 | 43.9 | 46.8 | 49.2 | 47.9 | 50.9 | 51.7 | 17.6 | 19.1 | 20.9 | 21.0 | 22.8 | 23.2 |
| 2023 | 42.0 | 44.3 | 45.7 | 44.2 | 46.2 | 46.8 | 44.0 | 47.0 | 49.4 | 47.9 | 51.0 | 51.8 | 17.7 | 19.3 | 21.1 | 21.1 | 23.0 | 23.3 |
| 2024 | 42.0 | 44.4 | 45.8 | 44.2 | 46.2 | 46.9 | 44.1 | 47.1 | 49.5 | 48.0 | 51.2 | 52.0 | 17.8 | 19.4 | 21.2 | 21.2 | 23.1 | 23.4 |
| 2025 | 42.1 | 44.5 | 45.9 | 44.2 | 46.3 | 46.9 | 44.2 | 47.3 | 49.7 | 48.0 | 51.3 | 52.1 | 17.9 | 19.5 | 21.3 | 21.3 | 23.2 | 23.5 |
| 2026 | 42.2 | 44.6 | 45.9 | 44.3 | 46.4 | 47.0 | 44.3 | 47.4 | 49.8 | 48.1 | 51.5 | 52.2 | 18.0 | 19.6 | 21.4 | 21.4 | 23.3 | 23.7 |
| 2027 | 42.2 | 44.7 | 46.0 | 44.3 | 46.4 | 47.0 | 44.4 | 47.6 | 49.9 | 48.2 | 51.6 | 52.3 | 18.1 | 19.7 | 21.5 | 21.5 | 23.4 | 23.8 |
| 2028 | 42.3 | 44.8 | 46.1 | 44.3 | 46.5 | 47.1 | 44.5 | 47.7 | 50.1 | 48.2 | 51.7 | 52.5 | 18.2 | 19.8 | 21.6 | 21.5 | 23.6 | 23.9 |
| 2029 | 42.4 | 44.8 | 46.1 | 44.3 | 46.5 | 47.1 | 44.6 | 47.8 | 50.2 | 48.3 | 51.9 | 52.6 | 18.2 | 19.9 | 21.8 | 21.6 | 23.7 | 24.0 |
| 2030 | 42.4 | 44.9 | 46.2 | 44.3 | 46.6 | 47.2 | 44.5 | 48.0 | 50.4 | 48.1 | 52.0 | 52.7 | 18.1 | 20.0 | 21.9 | 21.4 | 23.8 | 24.1 |
| 2031 | 42.4 | 45.0 | 46.3 | 44.3 | 46.6 | 47.2 | 44.6 | 48.1 | 50.5 | 48.2 | 52.1 | 52.9 | 18.2 | 20.2 | 22.0 | 21.5 | 23.9 | 24.2 |
| 2032 | 42.5 | 45.1 | 46.3 | 44.3 | 46.7 | 47.3 | 44.7 | 48.3 | 50.6 | 48.3 | 52.3 | 53.0 | 18.3 | 20.3 | 22.1 | 21.6 | 24.0 | 24.3 |
| 2033 | 42.6 | 45.2 | 46.4 | 44.3 | 46.7 | 47.3 | 44.8 | 48.4 | 50.8 | 48.3 | 52.4 | 53.1 | 18.3 | 20.4 | 22.2 | 21.7 | 24.1 | 24.4 |
| 2034 | 42.6 | 45.2 | 46.5 | 44.3 | 46.8 | 47.3 | 44.9 | 48.6 | 50.9 | 48.4 | 52.6 | 53.2 | 18.4 | 20.5 | 22.3 | 21.8 | 24.3 | 24.6 |
| 2035 | 42.7 | 45.3 | 46.5 | 44.4 | 46.8 | 47.4 | 45.0 | 48.7 | 51.1 | 48.5 | 52.7 | 53.4 | 18.5 | 20.6 | 22.5 | 21.9 | 24.4 | 24.7 |
| 2036 | 42.7 | 45.4 | 46.6 | 44.4 | 46.9 | 47.4 | 45.1 | 48.8 | 51.2 | 48.5 | 52.8 | 53.5 | 18.6 | 20.7 | 22.6 | 21.9 | 24.5 | 24.8 |
| 2037 | 42.8 | 45.5 | 46.7 | 44.4 | 46.9 | 47.5 | 45.2 | 49.0 | 51.3 | 48.6 | 53.0 | 53.6 | 18.7 | 20.8 | 22.7 | 22.0 | 24.6 | 24.9 |
| 2038 | 42.9 | 45.6 | 46.7 | 44.4 | 47.0 | 47.5 | 45.3 | 49.1 | 51.5 | 48.7 | 53.1 | 53.8 | 18.8 | 20.9 | 22.8 | 22.1 | 24.7 | 25.0 |
| 2039 | 42.9 | 45.6 | 46.8 | 44.4 | 47.0 | 47.5 | 45.4 | 49.2 | 51.6 | 48.7 | 53.2 | 53.9 | 18.9 | 21.0 | 22.9 | 22.2 | 24.8 | 25.1 |
| 2040 | 43.0 | 45.7 | 46.8 | 44.4 | 47.1 | 47.6 | 45.5 | 49.4 | 51.7 | 48.8 | 53.4 | 54.0 | 19.0 | 21.1 | 23.0 | 22.3 | 25.0 | 25.2 |
| 2041 | 43.0 | 45.8 | 46.9 | 44.4 | 47.1 | 47.6 | 45.6 | 49.5 | 51.9 | 48.9 | 53.5 | 54.1 | 19.1 | 21.2 | 23.1 | 22.4 | 25.1 | 25.3 |
| 2042 | 43.1 | 45.8 | 46.9 | 44.4 | 47.2 | 47.7 | 45.7 | 49.6 | 52.0 | 48.9 | 53.6 | 54.3 | 19.1 | 21.3 | 23.3 | 22.5 | 25.2 | 25.5 |
| 2043 | 43.1 | 45.9 | 47.0 | 44.5 | 47.2 | 47.7 | 45.8 | 49.8 | 52.1 | 49.0 | 53.8 | 54.4 | 19.2 | 21.5 | 23.4 | 22.5 | 25.3 | 25.6 |
| 2044 | 43.2 | 46.0 | 47.0 | 44.5 | 47.3 | 47.7 | 45.9 | 49.9 | 52.3 | 49.1 | 53.9 | 54.5 | 19.3 | 21.6 | 23.5 | 22.6 | 25.4 | 25.7 |
| 2045 | 43.3 | 46.1 | 47.1 | 44.5 | 47.3 | 47.8 | 46.0 | 50.0 | 52.4 | 49.1 | 54.0 | 54.6 | 19.4 | 21.7 | 23.6 | 22.7 | 25.5 | 25.8 |
| 2046 | 43.3 | 46.1 | 47.1 | 44.5 | 47.3 | 47.8 | 46.1 | 50.2 | 52.5 | 49.2 | 54.2 | 54.8 | 19.5 | 21.8 | 23.7 | 22.8 | 25.7 | 25.9 |
| 2047 | 43.4 | 46.2 | 47.2 | 44.5 | 47.4 | 47.8 | 46.2 | 50.3 | 52.7 | 49.3 | 54.3 | 54.9 | 19.6 | 21.9 | 23.8 | 22.9 | 25.8 | 26.0 |
| 2048 | 43.4 | 46.3 | 47.2 | 44.5 | 47.4 | 47.9 | 46.3 | 50.4 | 52.8 | 49.3 | 54.4 | 55.0 | 19.7 | 22.0 | 23.9 | 23.0 | 25.9 | 26.1 |
