# Supplementary material for: Future trends of life expectancy by education in the Netherlands
Source: Springer Nature journal article supplement (doi:10.1186/s12889-022-13275-w), 2022-09-02

Supplementary material to “Future trends of life expectancy by education in the Netherlands” by  
WJ Nusselder & AMB De Waegenaere et al, BMC Public Health 2022,

Appendix 5 Life expectancy between age 35 and 85 based on observed and modelled rates

Figure A4-1 Life expectancy between age 35 and 85 based on observed mortality rates (deaths/exposed) and modelled mortality rates, for men (upper panel) and for women (lower panel).

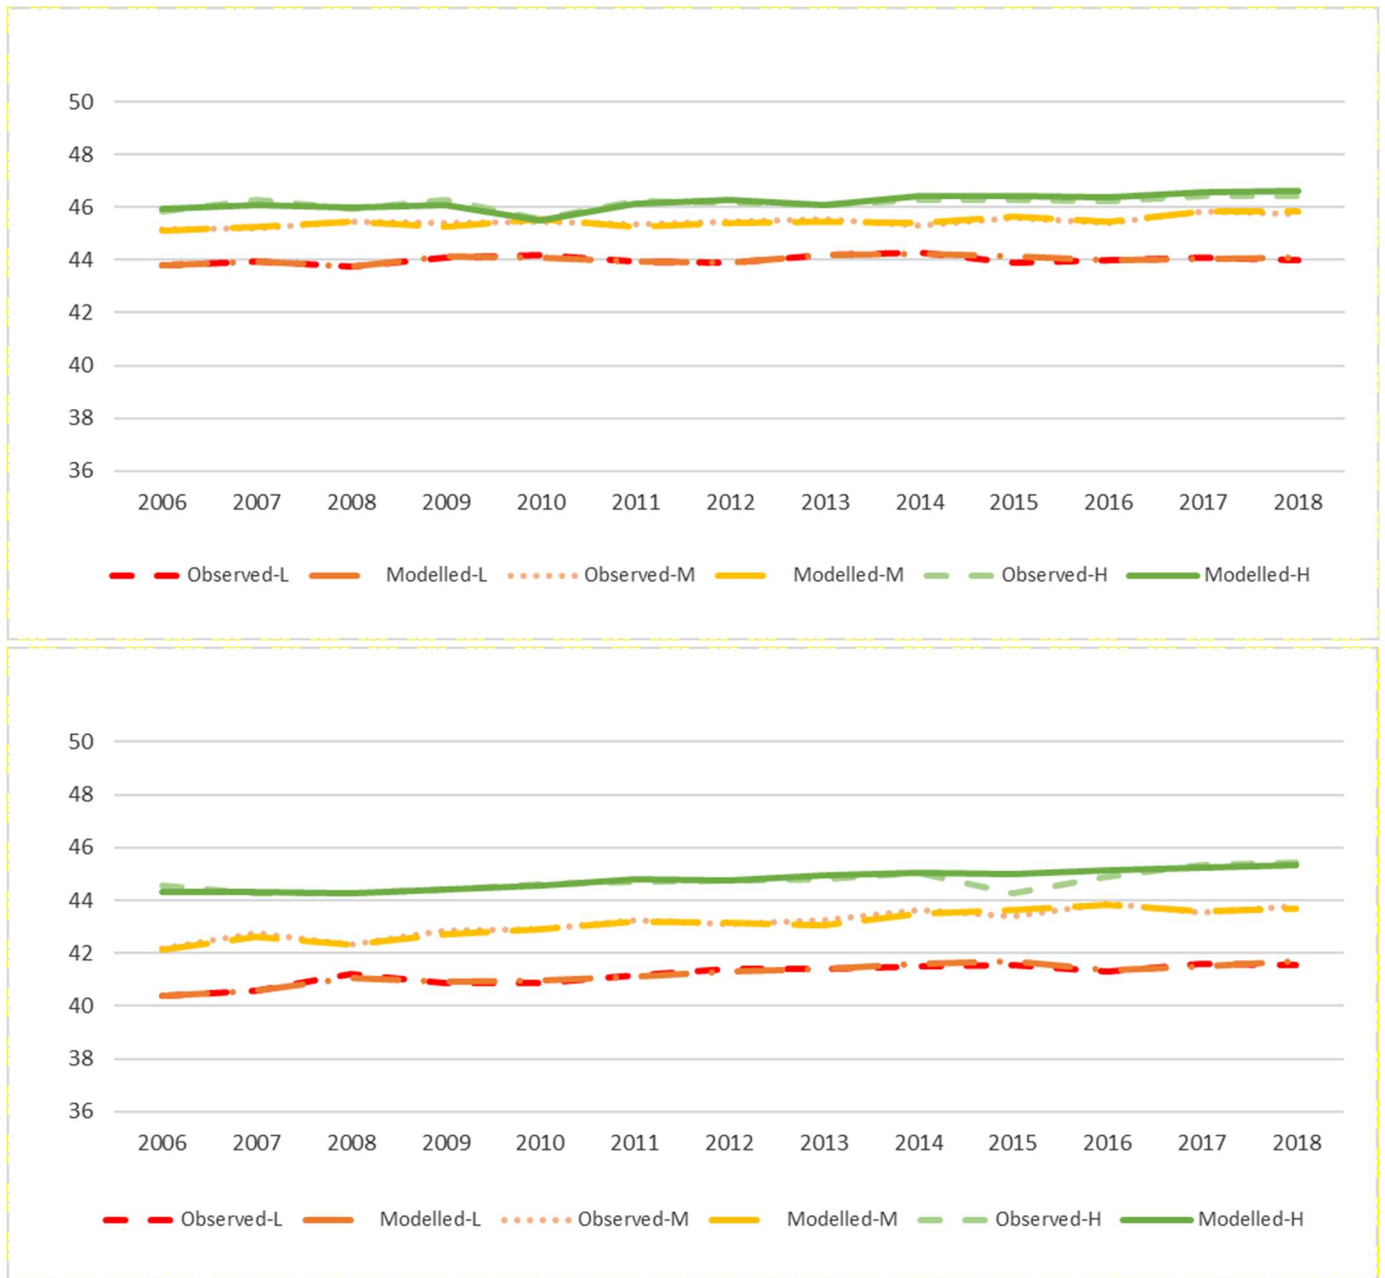

Supplement: MOESM5 [file 23447478]
